# Supplementary material
Source: Springer Nature journal article supplement (https://www.springermedizin.de/resource/supplementary/12958_2006_305_MOESM1_ESM.pdf/9567586)

**A**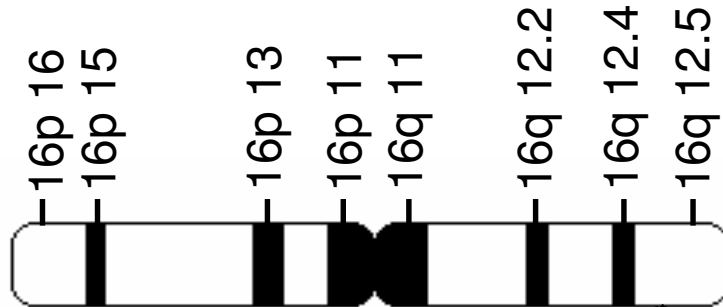**B**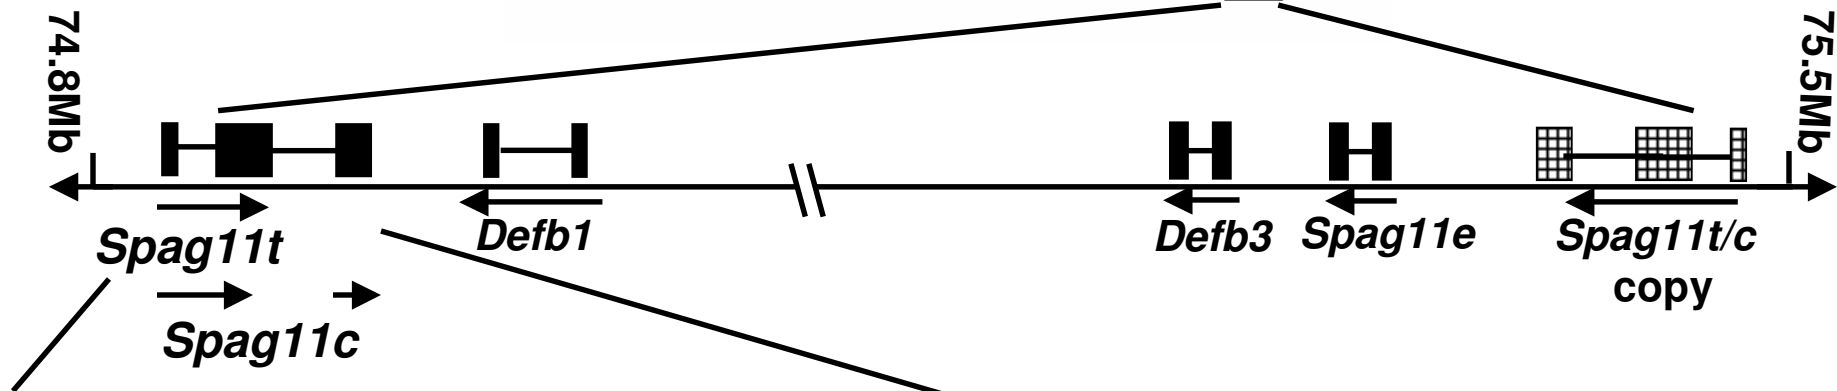**C**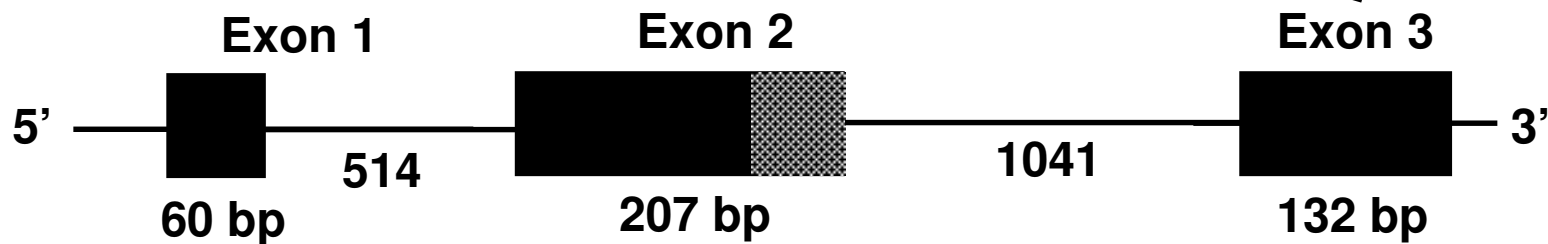

Supplement: MOESM1 [file 9567586]
